# Supplementary material for: Changes in Total Energy, Nutrients and Food Group Intake among Children and Adolescents during the COVID-19 Pandemic—Results of the DONALD Study
Source: MDPI journal article supplement (doi:10.3390/nu14020297), 2022-01-11
Supplement: s1 [file s1]

## Supplementary data

**Table S1:** Sensitivity analyses for underreporting: Dietary intake during the COVID-19 pandemic in 2020 compared to pre-pandemic intake, excluding participants with underreported records (n=17)

| Outcome (Dietary intake)                              | Crude Model           |          | Adjusted Model          |               |
|-------------------------------------------------------|-----------------------|----------|-------------------------|---------------|
|                                                       | $\beta$ (CI)          | <i>p</i> | $\beta$ (CI)            | <i>p</i>      |
| Difference in total energy intake (kcal) <sup>1</sup> |                       |          |                         |               |
| Pandemic                                              | 20.47 (-42.49; 83.43) | 0.5199   | -95.77 (-163.68; 27.85) | <b>0.0063</b> |
| Pre-pandemic (reference group)                        | 0                     |          | 0                       |               |
| Difference in fat intake (%E) <sup>2</sup>            |                       |          |                         |               |
| Pandemic                                              | 0.44 (-1.10; 1.98)    | 0.5736   | 0.26 (-1.30; 1.81)      | 0.7446        |
| Pre-pandemic (reference group)                        | 0                     |          | 0                       |               |
| Difference in protein intake (%E) <sup>3</sup>        |                       |          |                         |               |
| Pandemic                                              | 0.11 (-0.51; 0.74)    | 0.7229   | 0.08 (-0.57; 0.73)      | 0.8099        |
| Pre-pandemic (reference group)                        | 0                     |          | 0                       |               |
| Difference in carbohydrate intake (%E) <sup>2</sup>   |                       |          |                         |               |
| Pandemic                                              | -0.57 (-2.20; 1.05)   | 0.4833   | -0.32 (-1.96; 1.32)     | 0.6973        |
| Pre-pandemic (reference group)                        | 0                     |          | 0                       |               |
| Difference in Free sugar intake (%E) <sup>4</sup>     |                       |          |                         |               |
| Pandemic                                              | -0.00 (-1.25; 1.24)   | 0.9925   | -0.51 (-1.81; 0.80)     | 0.4442        |
| Pre-pandemic (reference group)                        | 0                     |          | 0                       |               |
| Difference in Food group intake (g/1000kcal)          |                       |          |                         |               |
| Ultra processed foods <sup>1</sup>                    |                       |          |                         |               |
| Pandemic                                              | 4.36 (-16.78; 24.50)  | 0.6824   | -5.54 (28.19; 17.12)    | 0.6278        |
| Pre-pandemic (reference group)                        | 0                     |          | 0                       |               |
| Fruits and vegetables <sup>1</sup>                    |                       |          |                         |               |
| Pandemic                                              | -4.52 (-22.05; 13.00) | 0.6087   | 1.92 (-16.76; 20.59)    | 0.8386        |
| Pre-pandemic (reference group)                        | 0                     |          | 0                       |               |
| Sugar sweetened beverages <sup>5</sup>                |                       |          |                         |               |
| Pandemic                                              | 0.77 (-17.50; 19.04)  | 0.9331   | -11.25 (-30.16; 7.67)   | 0.2400*       |
| Pre-pandemic (reference group)                        | 0                     |          | 0                       |               |
| Juices <sup>6</sup>                                   |                       |          |                         |               |
| Pandemic                                              | 4.78 (-10.76; 20.31)  | 0.5426   | 5.89 (-9.82; 21.59)     | 0.4583*       |
| Pre-pandemic (reference group)                        | 0                     |          | 0                       |               |

Comparison of dietary intake during the COVID-19 pandemic in 2020 (15th march – 11th august in Dortmund, Germany) and pre-pandemic intake (One (n=85) or two (n=6) years before the start of the COVID-19 pandemic in March 2020) were tested using polynomial mixed-effects regression models; significant p-values of the adjusted models are marked bold; Crude models include predictor (pandemic (yes/no)), outcome (dietary variable) and are adjusted for sex (male/female).<sup>1</sup>Model contains a random statement for the family level with an unstructured covariance structure and a random statement for the person level with an unstructured covariance structure. Adjusted models are adjusted for sex (male/female), age (years) and season (summer/autumn/winter/spring).<sup>2</sup>Model contains a random statement for the family level with an unstructured covariance structure. Adjusted models are adjusted for sex (male/female) and age (years).<sup>3</sup>Model contains a random statement for the family level with an unstructured covariance structure. Adjusted models are adjusted for sex (male/female), maternal employment (yes/no), overweight status of the participant (yes/no), season (summer/autumn/winter/spring) and age (years).<sup>4</sup>Model contains a random statement for the family level with an unstructured covariance structure and a repeated statement for the person level with a spatial exponential covariance structure. Adjusted models are adjusted for sex (male/female), season (summer/autumn/winter/spring) and age (years).<sup>5</sup>Model contains a random statement for the family level with an unstructured covariance structure. Adjusted models are adjusted for sex (male/female), age (years), maternal high education (yes/no), season (summer/autumn/winter/spring).<sup>6</sup>Model contains a random statement for the family level with an unstructured covariance structure and a repeated statement for the person level with an unstructured covariance structure. Adjusted models are adjusted for sex (male/female) and age (years). \*Residuals of the final models are not normal distributed
